1 **Effect of Hyperbaric Oxygen After Moderate-Intensity Exercise on Fatigue: A Single-**  
2 **blind Crossover Randomized Trial**

3

4 Kazuyoshi Yagishita<sup>1,2</sup>, Junya Aizawa<sup>3</sup>, Shunsuke Ohji<sup>3</sup>, Takashi Hoshino<sup>2</sup>, Takuya Oyaizu<sup>1,4</sup>

5

6 <sup>1</sup> Hyperbaric Medical Center, Science Tokyo Hospital, Institute of Science Tokyo, Tokyo,  
7 Japan

8 <sup>2</sup> Sports Science Department, Science Tokyo Hospital, Institute of Science Tokyo, Tokyo,  
9 Japan

10 <sup>3</sup> Department of Physical Therapy, Juntendo University, Tokyo, Japan

11 <sup>4</sup> Department of Orthopaedic Surgery, Institute of Science Tokyo, Tokyo, Japan

12

13 \* Corresponding Author

14 E-mail: [yagishita.orth@tmd.ac.jp](mailto:yagishita.orth@tmd.ac.jp) (KY)

15

16  
17  
18  
19  
20  
21  
22  
23  
24  
25  
26  
27  
28  
29  
30  
31  
32  
33  
34  
35  
36  
37  
38  
39  
40  
41  
42  
43  
44  
45  
46  
47

## **Abstract**

### **Objectives**

Although insufficient delivery of oxygen might be a factor in physical and perceived fatigue, the relationship between exposure to hyperbaric oxygen (HBO) and recovery from perceived fatigue remains unexplained. The purpose of this study was to investigate the effects of exposure to HBO after long-duration, medium-intensity training on recovery from perceived fatigue in a single-blind study.

### **Methods**

Fatigue was induced in nine male university students (mean age: 21.3 years) using an ergometer exercise bike at a moderate intensity of 75% of their maximum heart rate for 60 min. Post-workout, subjects randomly received an intervention comprising exposure to HBO or an air placebo in a single-blind experimental trial. Blood tests were conducted, and perceived fatigue was evaluated by using visual analog scales (VAS) at five time points. One week later, a crossover trial was conducted.

### **Results**

For the HBO group, pre- to post-intervention mean VAS scores for whole-body fatigue significantly improved from 48.4 to 28.7 ( $p < 0.001$ ). However, in the placebo group, the improvement was not statistically significant. Hematological evaluations, including C-reactive protein level, white blood cell count, creatine kinase level, lactic acid level, T-cell count, CD4/CD8 ratio, and natural killer cell count, did not show any significant between-group differences except only BUN and free fatty acids levels 1.5 h after intervention and Mg levels immediately after intervention. There were also no significant differences in the results of other hematological assessments.

### **Conclusions**

The results of this study showed that perceived fatigue evaluated by VAS scores significantly improved in the HBO group in a blinded trial. However, this was not objectively supported by blood test results. HBO may have effects on recovery from perceived fatigue following long-duration, moderate-intensity exercise. However, the results of this study could not determine the efficacy of HBO on exercise-induced fatigue.

## **Introduction**

Hyperbaric oxygen (HBO) treatment is defined as an intervention in which an individual breathes near 100% oxygen intermittently while inside a hyperbaric chamber that is pressurized to greater than the sea level pressure (1 atmosphere absolute, ATA). For clinical purposes, the pressure must be equal to or exceed 1.4 ATA while breathing near 100% oxygen (1). HBO can increase serum dissolved oxygen levels in proportion to oxygen partial pressure and transport

54 dissolved oxygen to ischemic tissue. HBO is an established treatment for several conditions  
55 such as decompression illness, carbon monoxide poisoning, acute arterial disturbance,  
56 peripheral ischemic disease, compartment syndrome, and delayed radiation injury.

57 The effects of HBO treatment on soft tissue injuries during sports activities, including  
58 sprains (2, 3), ligament injuries (4-7), contusions, and muscle strains (8-13), have been widely  
59 reported. HBO is an effective treatment for edema reduction and improves local perfusion and  
60 oxygenation of the injured tissues (3, 13-15).

61 However, there is disagreement regarding the effectiveness of HBO treatment in promoting  
62 recovery from exercise-induced fatigue. Studies suggest that it has a positive effect; a study  
63 has shown that HBO treatment for delayed onset muscle soreness (DOMS) resulting from  
64 eccentric training of the quadriceps promoted eccentric torque recovery (16). More recently, a  
65 study of the effects of HBO treatment on muscle fatigue after repeated plantar flexion of the  
66 ankle joint found that HBO treatment reduced the decline in muscle force production (17).  
67 Further, in a study of Brazilian jiu-jitsu athletes, although no HBO intervention-related  
68 differences were found in the post-training blood tests, a significant difference in scores on a  
69 perceived recovery scale was found, suggesting its effect on self-perceived recovery (18).  
70 Finally, an insufficient delivery of oxygen has also been shown to be a factor in the  
71 development of central and peripheral fatigue (19).

72 In contrast, studies have also found that HBO treatment results in no significant difference  
73 in recovery from DOMS caused by eccentric workouts of the elbow or knee flexor muscle  
74 groups (20-22). Further, a Cochrane Review of research on the effectiveness of HBO for  
75 DOMS and closed soft tissue injury treatment found that evidence was insufficient to establish  
76 its superiority over other treatments (12). Therefore, studies that are carefully designed for  
77 validity would be needed to establish the effectiveness of HBO treatment for the treatment of  
78 fatigue. Thus, this study was designed as a high-quality single-blind, crossover randomized  
79 study with detailed multiple-biomarker items.

80 We hypothesized that HBO would reduce fatigue after long-duration, moderate-intensity  
81 exercise. The purpose of this study was to test the effectiveness of treating healthy male  
82 university students who regularly exercised with HBO for fatigue after exercise with a single-  
83 blind and crossover randomized trial.

84

85

## 86 **Materials and Methods**

### 87 ***Trial design***

88 The study used a crossover design in which all subjects received both the HBO intervention  
89 and air placebo following a training session with an interval of 1 week. For the first trial, they  
90 were randomly assigned to either the HBO or air placebo group. Randomization was allocated  
91 by the even or odd number of dice (KY), and participants were registered (TO). Only the

92 researchers knew the treatment that each subject was receiving, making it a single-blind study.  
93 The validity of the study design was ensured using a single-blind crossover randomized trial  
94 and tests for physical and mental effects using blood tests and self-rated evaluation scales.

95 The protocol for this study was approved by the institutional review board of Tokyo Medical  
96 and Dental University (TMDU No. 2000-901). The application period for this research is from  
97 January 4th to March 31st, 2012. The trial registry is the ISRCTN registry, and the registration  
98 number is ISRCTN81080077.

99

## 100 ***Subjects***

101 The subjects were healthy male university students who exercised regularly. To be eligible,  
102 students needed to be at least  $\geq 20$  and  $< 30$  years of age at the time they gave their informed  
103 consent. Receipt of written consent was considered as an indication that the student had  
104 voluntarily agreed to participate after having received and understood a thorough explanation  
105 of the study, and written informed consent was obtained from all subjects prior to participation.  
106 Eligible students were eliminated from the sample if they had difficulty relieving pressure in  
107 their ears (which precludes or makes HBO treatment difficult), claustrophobia, congenital  
108 pulmonary cysts, asthma, a history of pneumothorax, or heart disease or if they had experienced  
109 heart palpitations, precordial pain, or tachycardia during the previous year. The sample size  
110 was calculated to be 15 people based on an alpha error of 0.05, a detection rate of 0.8, and an  
111 effect size of 0.5. In the protocol for the ethics review, there were 15 people in each of the  
112 HBO, oxygen, and air groups. However, the oxygen group was not implemented, and the study  
113 was changed to a crossover study of the HBO group and the air group. In reality, 9 students  
114 were recruited. None of the eligible students met any of the exclusion criteria. The data were  
115 collected at Tokyo Medical and Dental University Hospital.

116

## 117 **Fig. 1. A flowchart of the experimental design**

118

### 119 ***Exercise protocol***

120 Fatigue was induced by having the subjects ride an ergometer exercise bike (Aerobike 75XL,  
121 COMBI Wellness Corp., Tokyo, Japan) at a medium intensity of 75% of their maximum heart  
122 rate, with a target pulse rate of 150 per minute for 60 min.

123

### 124 ***Intervention and placebo***

125 The HBO chamber in our university hospital was used; this multi-place HBO chamber can  
126 hold a maximum capacity of 16 individuals (NHC-412-A, Nakamura Tekko-Sho Corp., Tokyo,  
127 Japan). The HBO treatment protocol included 60 min of inhaling pure oxygen using a mask at  
128 pressures up to 2.5 ATA with two 5-min breaks to breathe air, 15 min for compression and 15  
129 min for decompression for a total of 100 min (Fig. 1). This treatment protocol is the standard

130 for HBO treatment and is used globally.

131

### 132 **Fig. 2. Protocol of hyperbaric oxygen intervention**

133

134 For the protocol for air placebo, we chose a pressure and time duration safe enough to  
135 prevent decompression sickness. The intervention consisted of 80 min of breathing air at  
136 pressures up to 1.2 ATA, with 10 min for compression and 10 min for decompression, for a  
137 total of 100 min (Fig. 2) (23).

138

### 139 **Fig. 3. Protocol of air placebo intervention**

140

141 To ensure that subjects could not tell whether they were being treated with HBO or air, the  
142 pressure gages in the treatment room were hidden from their view and covered with a piece of  
143 cloth, and the tubes delivering oxygen and air were also kept out of sight.

144 In addition, to investigate the reliability of this single-blind study, after subjects received the  
145 intervention, they were enquired whether they thought they had received the HBO or air  
146 placebo. The question was asked to the nine subjects a total of 18 times. Three responses from  
147 three subjects were invalid. The remaining 15 valid responses were used to determine the  
148 correct response rates.

149

### 150 **Measures**

#### 151 1) Visual analog scales (VAS)

152 VAS was used to measure perceived fatigue in their whole-body and leg. VAS score  
153 consisted of 100 points at full mark, with the worst condition designated as 100 points and no  
154 complaint as 0 point.

#### 155 2) Blood tests

156 Complete blood count: white blood cell (WBC), WBC differential, red blood cells,  
157 hemoglobin, hematocrit, and platelets.

158 Biochemical tests: C-reactive protein, erythrocyte sedimentation rate, aspartate transaminase,  
159 alanine transaminase, zinc tolerance test, alkaline phosphatase, lactate dehydrogenase (LDH),  
160  $\gamma$ -glutamyl transpeptidase, cholinesterase, creatinine kinase (CK), total protein, creatinine,  
161 blood urea nitrogen (BUN), uric acid, triglycerides, total cholesterol, amylase, glucose, free  
162 fatty acids, albumin, lactate, bilirubin, potassium (K), calcium, magnesium (Mg), and  
163 myoglobin.

164 Immune system tests: interleukin-1 $\beta$  (IL-1 $\beta$ ), IL-6, tumor necrosis factor- $\alpha$  (TNF- $\alpha$ ), CD4,  
165 CD8, and natural killer (NK) cell count.

166

### 167 **Measurement timing**

168 Blood tests and VAS scores for fatigue were measured pre-exercise (test 1), post-exercise  
169 (test 2), post-intervention (test 3), 1.5 h post-intervention (test 4), and 24 hours post-  
170 intervention (test 5). The first and second trials (crossover trial) were conducted 1 week apart  
171 (Fig. 3).

172

173 **Fig. 4. Measurement timing in crossover trial: test 1, before exercise; test 2, after**  
174 **exercise; test 3, immediately after interventions; test 4, 1.5 h after interventions; and**  
175 **test 5, 24 h later.**

176

177 In the initial trial, five subjects received HBO treatment and four received placebo.  
178 Subsequently, in the crossover trial, four subjects received HBO treatment and five received  
179 placebo.

180

### 181 *Statistical analysis*

182 Data were expressed as mean  $\pm$  standard deviation and analyzed using SPSS version 19.0  
183 (SPSS Inc., Chicago, IL, USA). The VAS scores or laboratory data between the HBO and air  
184 groups were evaluated using two-way analysis of variance followed by Bonferroni post-hoc  
185 test, and data between the tests were evaluated using paired t-test.  $p < 0.05$  was considered  
186 statistically significant.

187

## 188 **Results**

### 189 *Baseline*

190 All nine subjects completed the experiment. Their mean age was  $21.3 \pm 1.2$  years (20–23  
191 years), mean height was  $172.2 \pm 6.2$  cm, and mean weight was  $82.3 \pm 15.7$  kg.

192

### 193 *Reliability of single-blinded study*

194 Of the 8 subjects who received the HBO intervention, 3 answered correctly and 5 answered  
195 incorrectly as “air”. Of the 7 subjects who received the air placebo, 5 answered correctly and  
196 2 answered incorrectly as “HBO”. The accuracy rate was 53.3%, indicating the high reliability  
197 of this blinded trial (Fig. 4).

198

### 199 **Fig. 5. Assessment of reliability of the blinded intervention**

200

### 201 *Side Effects*

202 No side effects were observed.

203

### 204 *VAS evaluation*

205 Regarding the VAS scores (Fig. 5-a, -b), in the HBO group, the mean scores for whole-body

206 fatigue at pre- to post-intervention (tests 2 and 3, respectively) significantly decreased from  
207  $48.4 \pm 17.3$  to  $28.8 \pm 18.6$  ( $p < 0.001$ ), whereas in the air group, the decrease was from  $43.2 \pm$   
208  $21.2$  to  $37.9 \pm 24.1$ , which was not statistically significant (Fig. 5-a). There were no significant  
209 differences in data between the HBO and air groups. For leg fatigue, in the HBO group, the  
210 mean scores at pre- to post-intervention (tests 2 and 3, respectively) significantly decreased  
211 from  $49.9 \pm 18.4$  to  $26.1 \pm 16.9$  ( $p < 0.001$ ), and in the air group, these significantly decreased from  
212  $54.7 \pm 17.1$  to  $43.6 \pm 24.0$  ( $p < 0.05$ ) (Fig. 5-b). Moreover, a significant difference in test 3 data  
213 was found between the HBO and air groups ( $p < 0.05$ ).

214

215 **Fig. 6-a, b. Results of the visual analog scale of whole-body and leg fatigue. \* and \*\***  
216 **indicate the comparison between the tests, and § indicates the comparison between the**  
217 **groups.**

218

### 219 ***Blood test***

220 Comparative analysis of blood test (Fig. 6) results between the two groups showed  
221 significantly higher BUN and free fatty acids levels in test 4 ( $p < 0.05$ ) and Mg levels in test 3  
222 ( $p < 0.05$ ) in the HBO group. No other significant differences in any of the results including  
223 lactate were found.

224

225 **Fig. 7-a-p. Blood test results. CK, creatinine kinase; CRP, C-reactive protein; IL,**  
226 **interleukin; Mg, magnesium; NK, natural killer cells; TNF $\alpha$ , tumor necrosis alpha;**  
227 **WBC, white blood cells**

228

229 Test results indicating comparatively large post-exercise changes in both groups were  
230 particularly found for WBC, CD4-type lymphocyte, lactic acid, free fatty acids, and IL-6 levels.  
231 WBC count increased post-exercise in both groups but returned to pre-exercise levels on the  
232 following day. Neutrophil count increased and Lymphocyte count decreased in test 3, but there  
233 was no significant difference between the groups.

234 In the HBO group, the CD4/CD8 ratio was significantly higher in test 3 than in test 2.  
235 Although lactic acid levels markedly increased post-exercise, there was no significant  
236 difference at any time point between the groups. On the comparison of myoglobin levels for  
237 tests 2 and 3, no significant difference was found in the HBO group, and there was no  
238 significant difference at any time point between the groups.

239

### 240 **Discussion**

#### 241 ***Study design and establishing the fatigue-induced workout***

242 This study was a well-designed, single-blind, crossover randomized trial, given the high  
243 reliability of this blinded intervention, with a response accuracy rate of 53.3% and an expected

244 value of 50.0%.

245 In the review of studies on the effects of HBO on recovery from fatigue after exercise, only  
246 two studies were conducted as crossover, and there were no randomized studies (23). In  
247 addition, establishing a protocol for a control group's use of a hyperbaric chamber is generally  
248 difficult. At the very least, all groups need to be inside the chamber for the same amount of  
249 time. In this study, similar to the approach of Babul et al., the controls (air group) breathed air  
250 (21% oxygen) through a mask at a pressure of 1.2 ATA (2). According to a review of control  
251 group protocols in single-blind HBO treatment studies, rather than using the same pressure as  
252 in the HBO treatment, it is more valid to have the controls breathe air consisting of 21% oxygen  
253 at a lower ATA than for HBO (24). In the present study, when subjects were asked whether  
254 they had been breathing HBO or air at 1.2 ATA, the correct response rate was 53.3%.  
255 Approximately 50% were mistaken, suggesting that the protocol for the control group was valid.

256 HBO studies have used various types of workouts to induce fatigue. A recent study using  
257 jiu-jitsu training sessions set workout time and intensity at 1.5 hours and the highest possible  
258 intensity (9). While some previous studies have used arm exercises (19), in this study, because  
259 a workout was needed that would affect the whole-body rather than only specific muscles, we  
260 decided to have the subjects train for a long time at a moderate intensity until exhaustion using  
261 a high-intensity training ergometer exercise bike.

262 Changes in lymphocyte counts can be used as an indicator of exercise intensity because the  
263 count increases until the subject finishes exercising, after which it rapidly decreases (7).  
264 Similarly, in this study, in both the intervention and control groups, increased lymphocyte  
265 counts were confirmed immediately after exercise completion, and about 2 hours later, the  
266 counts markedly decreased. As there were no significant differences in these counts between  
267 the intervention and control groups, it can be assumed that subjects in both groups had  
268 exercised with similar high intensity, and/or that the intervention had little effect.

269

### 270 ***The Effect of HBO treatment on VAS scores for whole-body fatigue and leg fatigue***

271 With regard to fatigue-related VAS scores, in this study, although there was significant pre-  
272 to post-intervention improvement in whole-body fatigue in the HBO group, no such difference  
273 was found in the air group. In addition, comparison of the degree of improvement between the  
274 groups showed that improvement was significantly greater in the HBO group. Leg fatigue  
275 scores in this group significantly improved between post-exercise test 2 and post-intervention  
276 test 3 from  $49.9 \pm 18.4$  to  $26.1 \pm 16.9$  ( $p < 0.001$ ) as did the scores for the air group from  $54.7 \pm$   
277  $17.1$  to  $43.6 \pm 24.0$  ( $p < 0.05$ ). However, improvement was greater in the HBO group.

278 Akarsu et al. documented the efficacy of HBO on chronic fatigue syndrome, evaluated with  
279 the VAS, Fatigue Severity Scale, and Fatigue Quality of Life Score and found that HBO  
280 decreased the severity of symptoms and increased the quality of life (25). In a study of the  
281 effectiveness of HBO treatment for acute ankle sprain, Yagishita et al. found that VAS scores



282 for pain decreased from pre- to post-intervention (26).

283 In a study on the effects of HBO on exercise-induced fatigue, Shimoda et al. documented the  
284 effects of HBO on muscle fatigue test from 50-time isometric repetitive exercises of ankle  
285 planter flexion, reporting that HBO inhibited the reduction of muscle power during repetitive  
286 exercise (27).

287 On the contrary, a study that measured grip contractile force in subjects in a hyperbaric  
288 chamber found that while contractile force increased with HBO, decline in force production  
289 was faster, compared with the control group, as muscle fatigue increased (28). Further, other  
290 studies have concluded that exposure to HBO before exercise does not result in improved  
291 performance (13, 21). In addition, according to the Cochrane Review, data from trials of HBO  
292 treatment for DOMS showed higher pain at 48 and 72 h after treatment (5).

293 In the present study, no significant differences in exercise load were found between the HBO  
294 and air groups. However, the results of VAS scores for leg fatigue after the intervention were  
295 significantly lower in the HBO group than in the air group. This suggests that HBO treatment  
296 after moderate-intensity exercise may have an effect on brain or skeletal muscles.

297

### 298 ***Blood test results***

299 Biochemical testing for CK serum level may have a role in monitoring healthy muscle  
300 response to training (8). In this study, although CK levels increased by about 10% in both the  
301 intervention and placebo groups after the workout, because testing for CK isozymes was not  
302 conducted, it was impossible to determine whether CK had originated from skeletal muscles.  
303 Myoglobin levels peak immediately after exercise when training has been so intense that it  
304 causes exercise-induced muscle damage and returns to its pre-exercise level within 24 h (29).  
305 As such, it is also a potential muscle damage marker (18). In our results, although no increase  
306 in myoglobin levels was found post-exercise in test 2, increased levels were found in test 3, but  
307 there was no significant difference between the groups.

308 Several previous studies have suggested that HBO has effects on immune system responses.  
309 Studies have shown that HBO may inhibit immune system responses (30, 31). Hou et al.  
310 investigated the effects on TNF- $\alpha$  and IL-6 in patients with brain tumor and reported that serum  
311 TNF- $\alpha$  and IL-6 levels were significantly lower after HBO than those in the control group (30).  
312 Oyaizu et al. reported that HBO suppressed the elevation of circulating macrophages in the  
313 acute phase and then accelerated macrophage invasion into the contused muscle (31). As a  
314 result, we looked at measures for numerous markers of immune system activity. However, we  
315 found no significant differences between the HBO and air groups in markers of immune system  
316 activity, including neutrophils, lymphocytes, TNF- $\alpha$  and IL-6.

317 Oyaizu et al. found that in rat skeletal muscle injured model treated with HBO, at 6 h and 24  
318 h after injury, neutrophil markers had decreased, and at 3, 5, and 7 days after injury,  
319 macrophage movement into injured tissue was accelerated (31). While this may suggest that

320 exposure to HBO accelerates a shift in the immune system through the early mobilization of  
321 macrophages, variation in data values was possible because of measurement timing. Other  
322 recent studies have suggested that HBO mobilizes stem cells (32, 33), and exposure to HBO  
323 after moderate-intensity training may function protectively by mobilizing stem cells to  
324 damaged muscle.

325 In this study, the mechanism by which HBO affects the immune system could not be  
326 determined. Further detailed studies are needed to understand these mechanisms.

327

### 328 ***Study limitations***

329 The limitations of this study include the small sample size, the limited number of biomarkers  
330 used, and the fact that measurements were only performed 1.5 h and 24 h after the intervention.  
331 If the measurement is performed at a different timing, the results may differ. In addition, this  
332 study only considered moderate exercise intensity. Future studies may need to evaluate the  
333 effects of HBO treatment after other types of intense exercises, such as short-duration, high-  
334 intensity exercise.

335

### 336 **Conclusion**

337 In this study, subjects' self-ratings indicated that HBO treatment may be effective in  
338 promoting recovery from fatigue after a long-duration, moderate-intensity exercise. However,  
339 this was not objectively supported by blood test results. We had hypothesized that HBO would  
340 reduce fatigue, but the results of this study could not determine the efficacy of HBO on  
341 exercise-induced fatigue. Consequently, at present, the use of HBO to hasten recovery from  
342 exercise-induced fatigue cannot be recommended.

343 However, because whole-body fatigue by subjective evaluation improved in a blinded trial,  
344 HBO may have some positive effects on recovery from exercise-induced fatigue via the central  
345 nerves system or skeletal muscles. More studies are needed to clarify the effects of HBO on  
346 fatigue.

347

### 348 **Acknowledgements**

349 We thank Dr. Mitsuhiro Enomoto, Dr. Toshiyuki Ohara, Mr. Manabu Shimoda for helping  
350 in the measurement and collection of subject data.

351

### 352 **Author Contributions**

353 Conceived and designed the experiment: KY, Performed the experiments: KY JA HK TO  
354 SO TK, Analyzed the data: KY HK TH TK, Wrote the paper: KY TK.

355

### 356 **References**

357 1. Huang ET. Definition of Hyperbaric Oxygen and its Safe Delivery. In: Huang ET, editors.

- 358 Undersea and Hyperbaric Medical Society. *Hyperbaric Medicine Indications Manual*. 15<sup>th</sup> ed.  
359 Best Publishing Company; 2023.
- 360 2. Babul S, Rhodes EC, Taunton JE, Lepawsky M. Effects of intermittent exposure to  
361 hyperbaric oxygen for the treatment of an acute soft tissue injury. *Clin J Sport Med* 2003;  
362 13:138–147. PMID: 12792207
- 363 3. Gabriel H, Urhausen A, Kindermann W. Circulating leucocyte and lymphocyte  
364 subpopulations before and after intensive endurance exercise to exhaustion. *Eur J Appl Physiol*  
365 *Occup Physiol* 1991; 63:449–457. PMID: 1837265
- 366 4. Barata P, Cervaens M, Resende R, Camacho O, Marques F. Hyperbaric oxygen effects on  
367 sports injuries. *Ther Adv Musculoskelet Dis* 2011; 3:111–121. PMID: 22870471
- 368 5. Bennett M, Best TM, Babul S, Taunton J, Lepawsky M. Hyperbaric oxygen therapy for  
369 delayed onset muscle soreness and closed soft tissue injury. *Cochrane Database Syst Rev* 2005;  
370 2005:CD004713. PMID: 16235376
- 371 6. Bitterman N, Bitterman H, Kinarty A, Melamed Y, Lahat N. Effect of a single exposure to  
372 hyperbaric oxygen on blood mononuclear cells in human subjects. *Undersea Hyperb Med*  
373 1993; 20:197–204. PMID: 8401149
- 374 7. Pedersen BK, Toft AD. Effects of exercise on lymphocytes and cytokines. *Br J Sports Med*  
375 2000; 34:246–251. PMID: 10953894
- 376 8. Brancaccio P, Maffulli N, Buonauro R, Limongelli FM. Serum enzyme monitoring in sports  
377 medicine. *Clin Sports Med* 2008; 27:1–18. PMID: 18206566
- 378 9. Branco BH, Fukuda DH, Andreato LV, Santos JF, Esteves JV, Franchini E. The effects of  
379 hyperbaric oxygen therapy on post-training recovery in Jiu-Jitsu athletes. *PLoS One* 2016;  
380 11:e0150517. PMID: 26959652
- 381 10. Brines R, Hoffman-Goetz L, Pedersen BK. Can you exercise to make your immune system  
382 fitter? *Immunol Today* 1996; 17:252–254. PMID: 8962624
- 383 11. Burns SF, Miyashita M, Stensel DJ. High-intensity interval exercise and postprandial  
384 triacylglycerol. *Sports Med* 2015; 45:957–968. PMID: 25851583
- 385 12. Conaty BJ, Shykoff BE, Florian JP. Thermoneutral water immersion and hyperbaric  
386 oxygen do not alter cortisol regulation. *Undersea Hyperb Med* 2015; 42:249-56. PMID:  
387 26152106
- 388 13. Rozenek R, Fobel BF, Banks JC, Russo AC, Lacourse MG, Strauss MB. Does hyperbaric  
389 oxygen exposure affect high-intensity, short-duration exercise performance? *J Strength Cond*  
390 *Res* 2007; 21:1037–41. PMID: 18076256
- 391 14. Amann M, Calbet JA. Convective oxygen transport and fatigue. *J Appl Physiol* (1985)  
392 2008; 104:861–870. PMID: 17962570
- 393 15. Fukuhara S, Suzukamo Y. *Manual of the SF-8 Japanese Version* (in Japanese). Kyoto:  
394 Institute for Health Outcomes and Process Evaluation Research. 2004.
- 395 16. Gadd MA, McClellan DS, Neuman TS, Hansbrough JF. Effect of hyperbaric oxygen on

- 396 murine neutrophil and T-lymphocyte functions. *Crit Care Med* 1990; 18:974–979.  
397 PMID: 2394122
- 398 17. Harrison BC, Robinson D, Davison BJ, Foley B, Seda E, Byrnes WC. Treatment of  
399 exercise-induced muscle injury via hyperbaric oxygen therapy. *Med Sci Sports Exerc* 2001;  
400 33:36–42. PMID: 11194109
- 401 18. Heavens KR, Szivak TK, Hooper DR, Dunn-Lewis C, Comstock BA, Flanagan SD, et al.  
402 The effects of high intensity short rest resistance exercise on muscle damage markers in men  
403 and women. *J Strength Cond Res* 2014; 28:1041–1049. PMID: 24662155
- 404 19. Mekjavic IB, Exner JA, Tesch PA, Eiken O. Hyperbaric oxygen therapy does not affect  
405 recovery from delayed onset muscle soreness. *Med Sci Sports Exerc* 2000; 32:558–563.  
406 PMID: 1073099
- 407 20. Heyboer M, Milovanova TN, Wojcik S, Grant W, Chin M, Hardy KR, et al. CD34+/CD45-  
408 dim stem cell mobilization by hyperbaric oxygen - changes with oxygen dosage. *Stem Cell Res*  
409 2014; 12:638–645. PMID: 24642336
- 410 21. Kawada S, Fukaya K, Ohtani M, Kobayashi K, Fukusaki C. Effects of pre-exposure to  
411 hyperbaric hyperoxia on high-intensity exercise performance. *J Strength Cond Res* 2008;  
412 22:66–74. PMID: 18296957
- 413 22. McCarthy DA, Dale MM. The leucocytosis of exercise. A review and model. *Sports Med*  
414 1988; 6:333–363. PMID: 3068772
- 415 23. Šet V, Lenasi H. Does Hyperbaric Oxygenation Improve Athletic Performance? *J Strength*  
416 *Cond Res* 2023; 37:482-493. PMID: 35900773
- 417 24. Lansdorp NC, van Hulst RA. Double-blind trials in hyperbaric medicine: A narrative  
418 review on past experiences and considerations in designing sham hyperbaric treatment. *Clin*  
419 *Trials* 2018; 15:462–476. PMID: 29865904
- 420 25. Akarsu S, Tekin L, Ay H, Carli AB, Tok F, Simşek K, et al. The efficacy of hyperbaric  
421 oxygen therapy in the management of chronic fatigue syndrome. *Undersea Hyperb Med* 2013;  
422 40:197–200. PMID: 23682549
- 423 26. Yagishita K, Oyiazu T, Aizawa J, Enomoto M. The effects of hyperbaric oxygen therapy  
424 on reduction of edema and pain in athletes with ankle sprain in the acute phase: a pilot study.  
425 *Sport Exerc Med Open J* 2017; 3:11–16.
- 426 27. Shimoda M, Enomoto M, Horie M, Miyakawa S, Yagishita K. Effects of hyperbaric oxygen  
427 on muscle fatigue after maximal intermittent plantar flexion exercise. *J Strength Cond Res*  
428 2015; 29:1648–1656. PMID: 25785701
- 429 28. Stewart J, Gosine D, Kaleel M, Kurtev A. Hyperbaric oxygen and muscle performance in  
430 maximal sustained muscle contraction. *Undersea Hyperb Med* 2011; 38:483–491.  
431 PMID: 22292253
- 432 29. Minahan C, Joyce S, Bulmer AC, Cronin N, Sabapathy S. The influence of estradiol on  
433 muscle damage and leg strength after intense eccentric exercise. *Eur J Appl Physiol* 2015;

- 434 115:1493–1500. PMID: 25694209
- 435 30. Hou S, Wu G, Liang J, Cheng H, Chen C. Hyperbaric oxygen on rehabilitation of brain  
436 tumors after surgery and effects on TNF- $\alpha$  and IL-6 levels. *Oncol Lett* 2019; 17:3277–3282.  
437 PMID: 30867760
- 438 31. Oyaizu T, Enomoto M, Yamamoto N, Tsuji K, Horie M, Muneta T, et al. Hyperbaric  
439 oxygen reduces inflammation, oxygenates injured muscle, and regenerates skeletal muscle via  
440 macrophage and satellite cell activation. *Sci Rep* 2018; 8:1288. PMID: 29358697
- 441 32. Thom SR, Bhopale VM, Velazquez OC, Goldstein LJ, Thom LH, Buerk DG. Stem cell  
442 mobilization by hyperbaric oxygen. *Am J Physiol Heart Circ Physiol* 2006; 290:H1378–1386.  
443 PMID: 16299259
- 444 33. Thom SR, Milovanova TN, Yang M, Bhopale VM, Sorokina EM, Uzun G, et al.  
445 Vasculogenic stem cell mobilization and wound recruitment in diabetic patients: increased cell  
446 number and intracellular regulatory protein content associated with hyperbaric oxygen therapy.  
447 *Wound Repair Regen* 2011; 19:149–161. PMID: 21362081

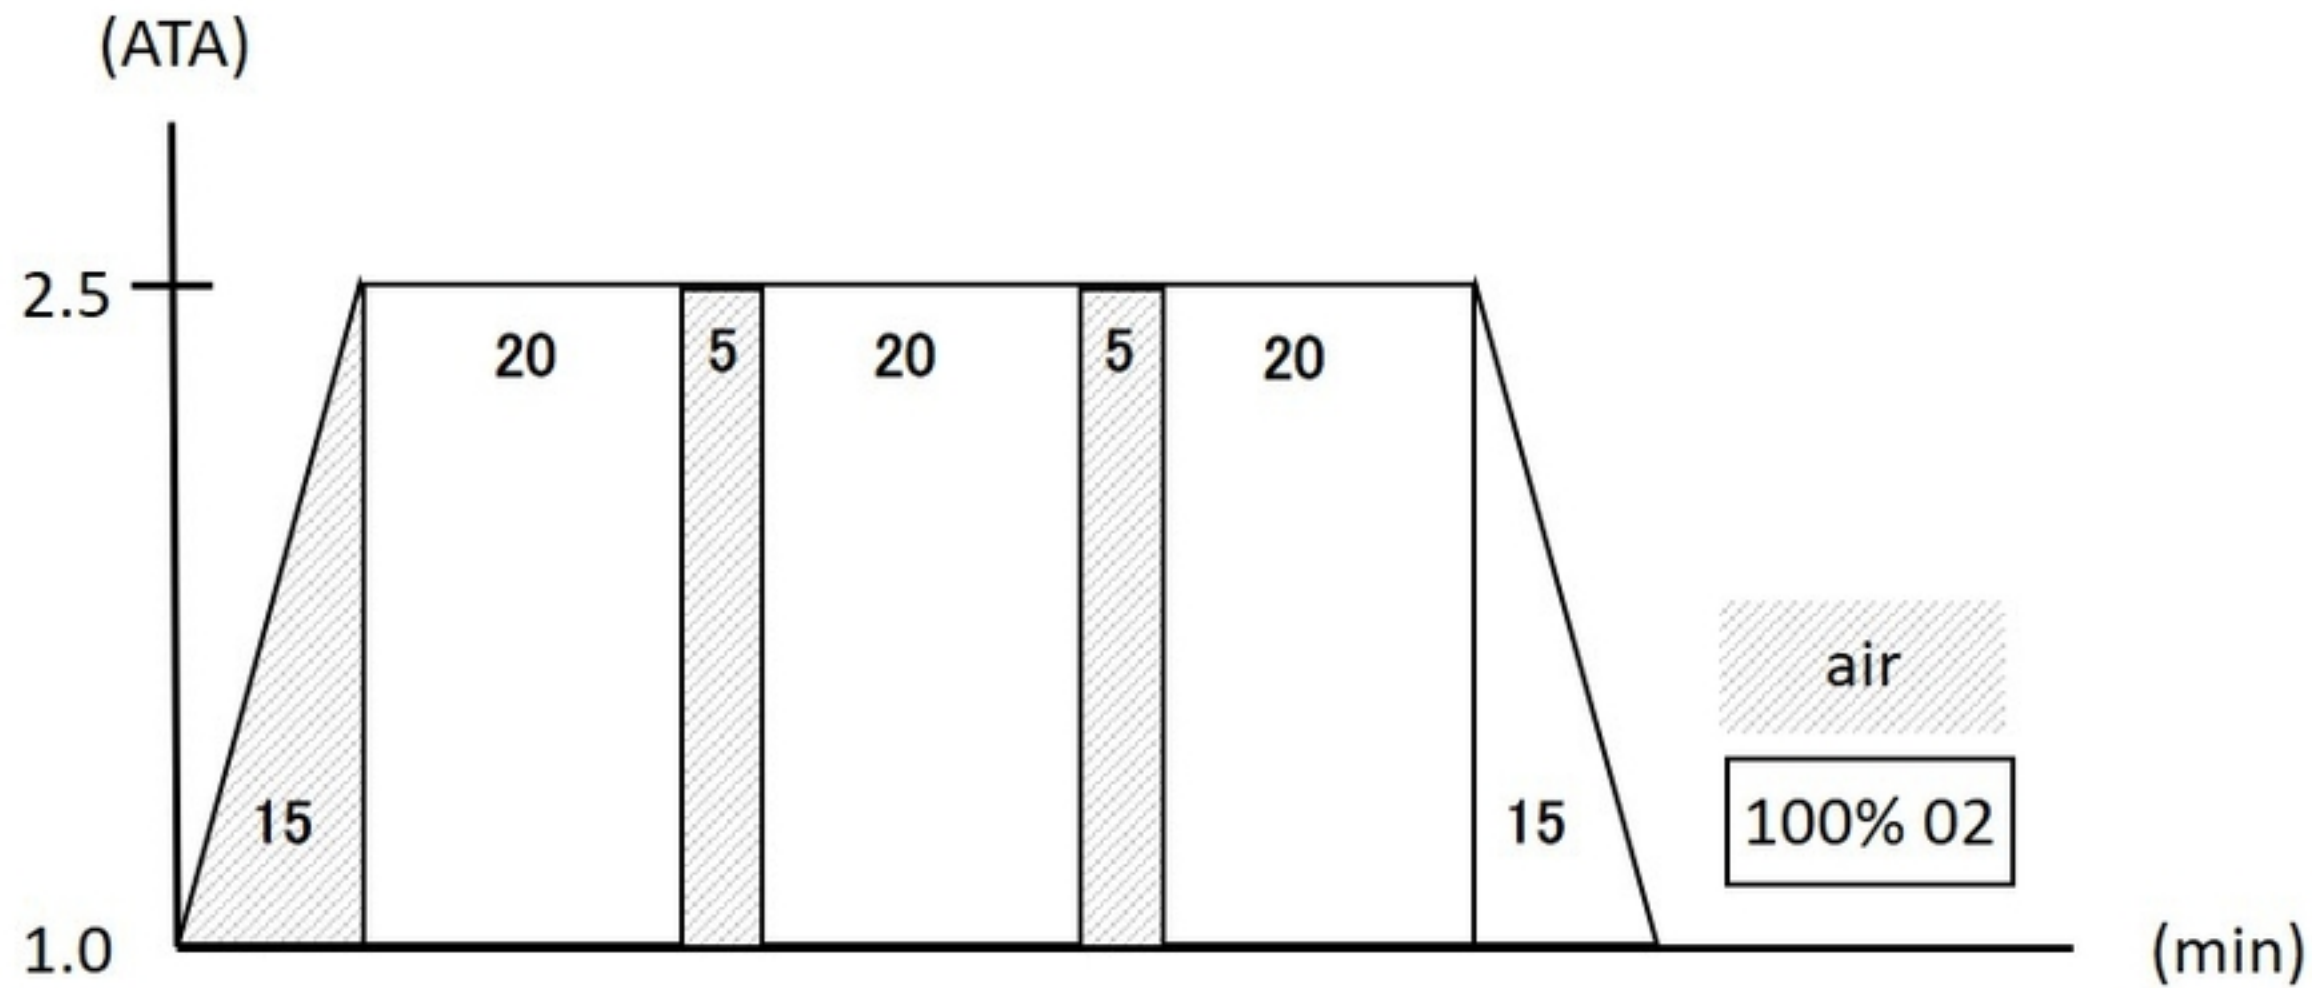

Figure 2

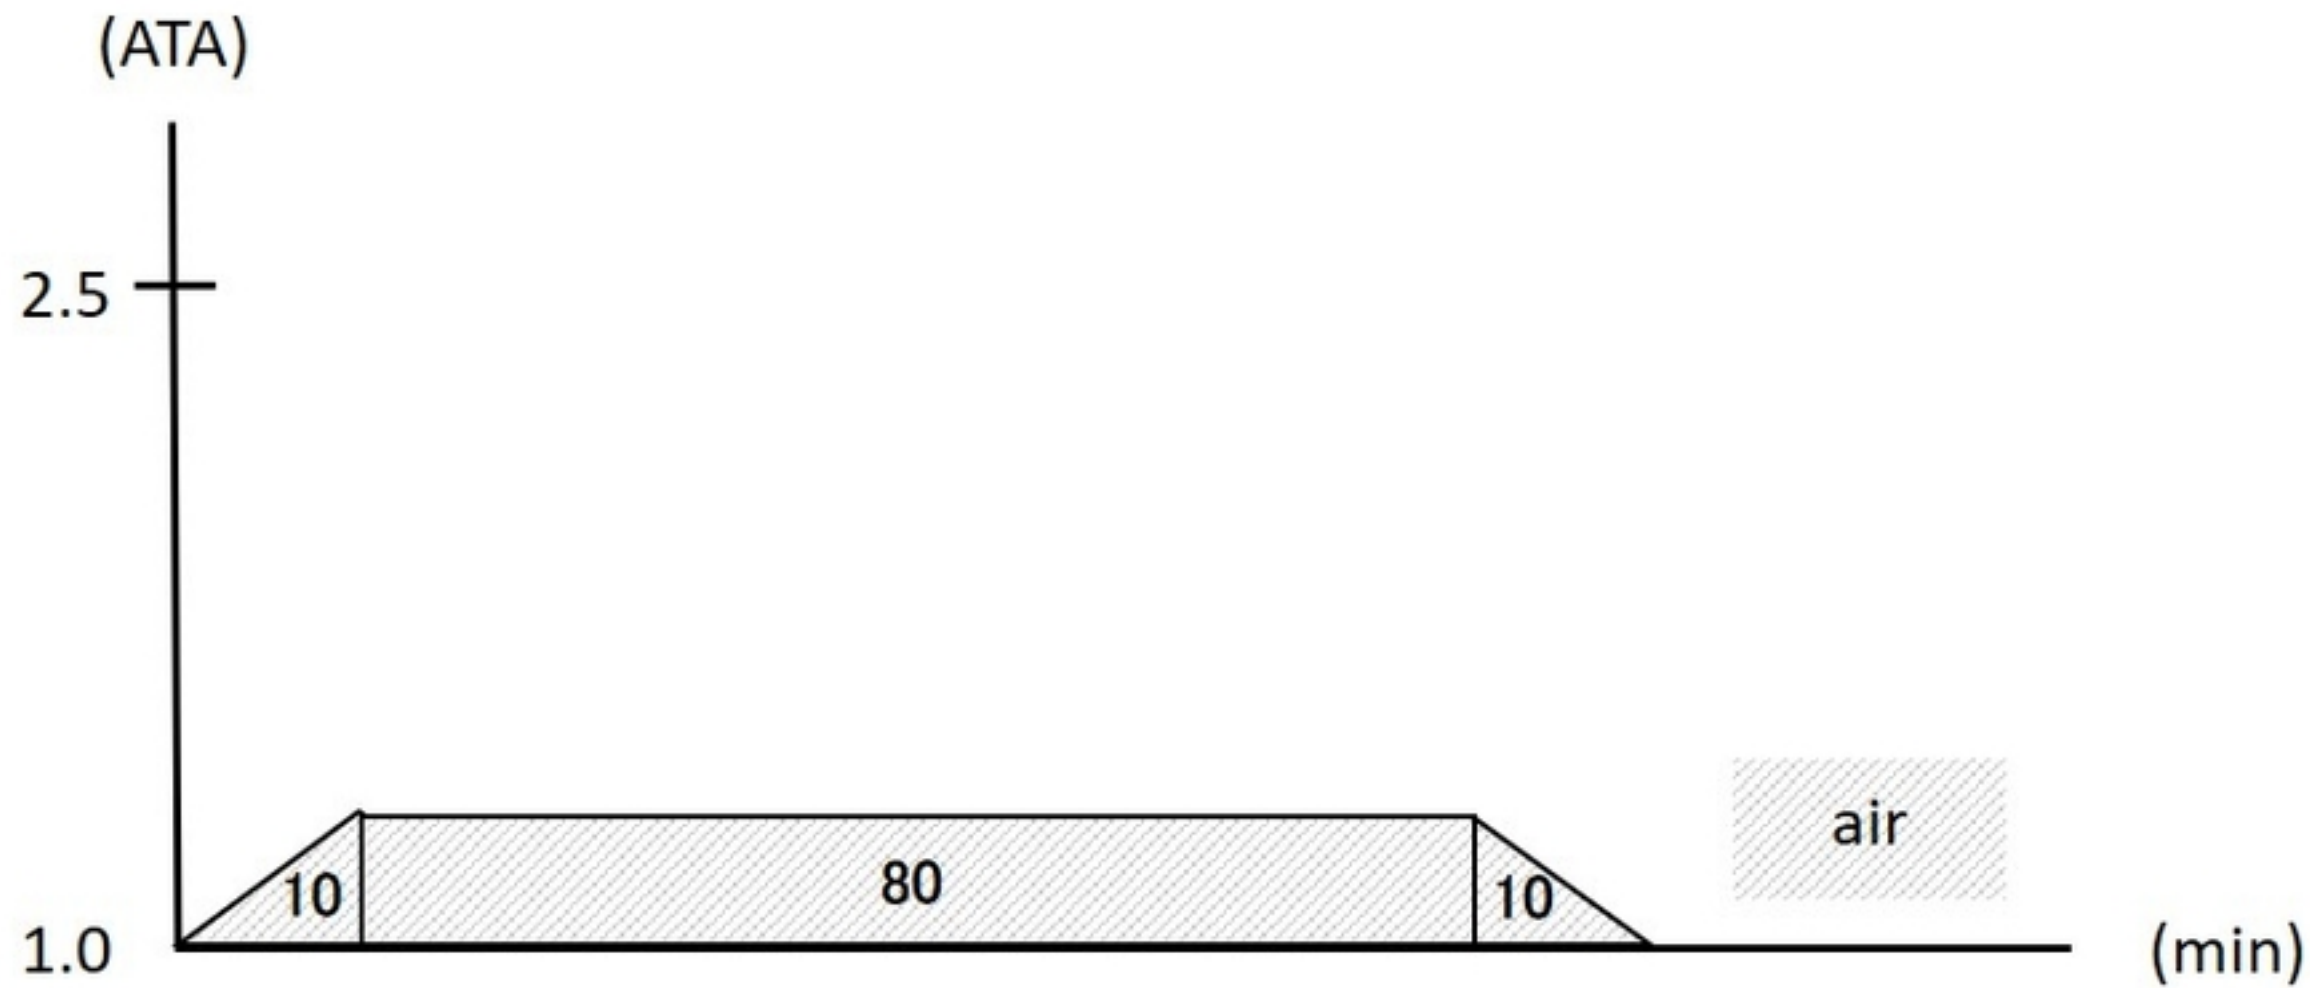

Figure 3

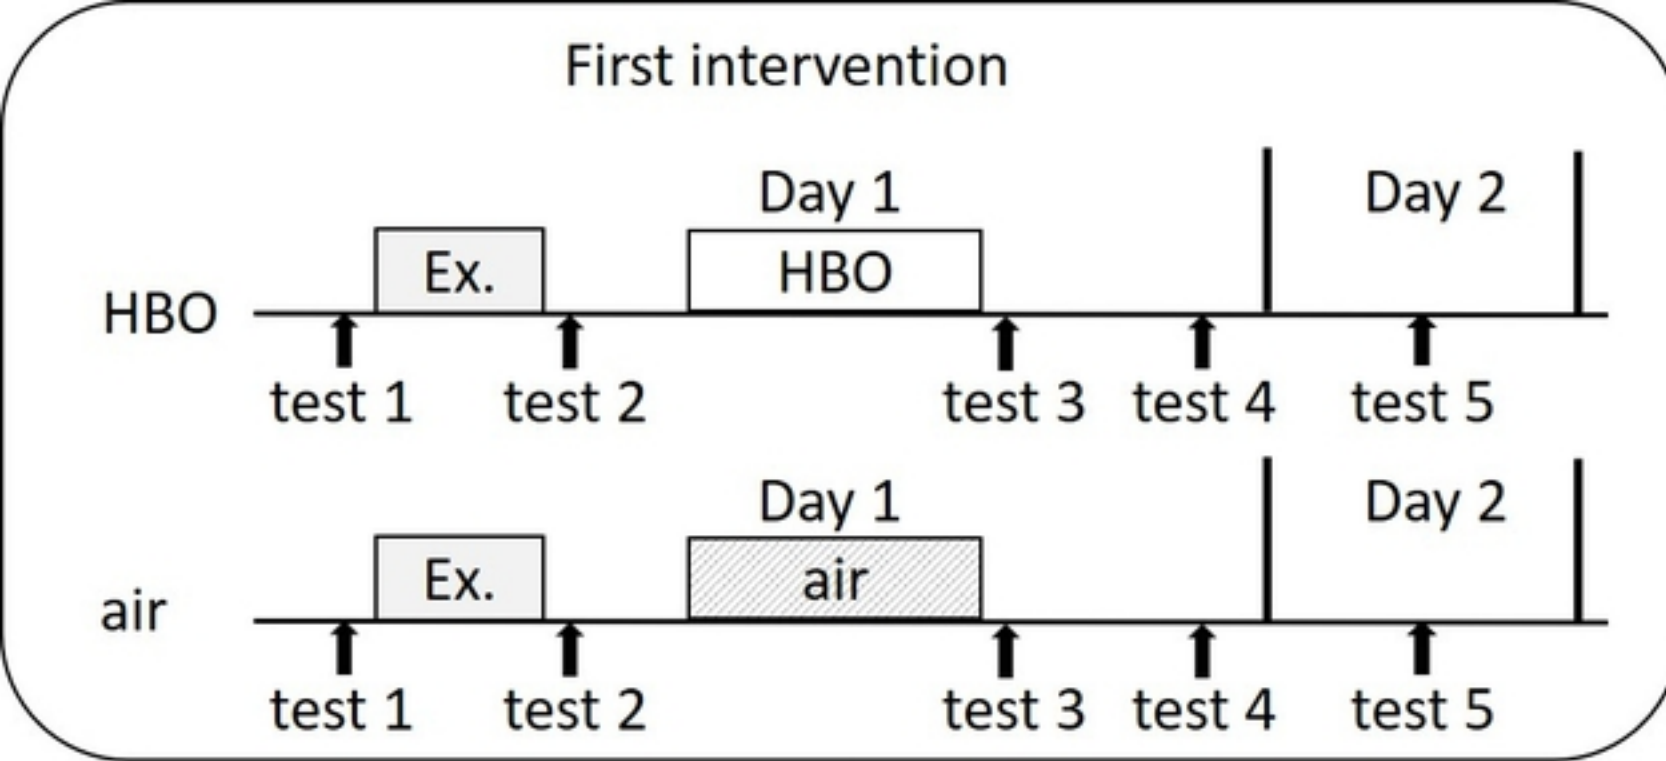

Test 1: before exercise  
 Test 2: after exercise  
 Test 3: immediately  
           after interventions  
 Test 4: 1.5 h after interventions  
 Test 5: 24 h later

1 week  
 ↓  
 crossover

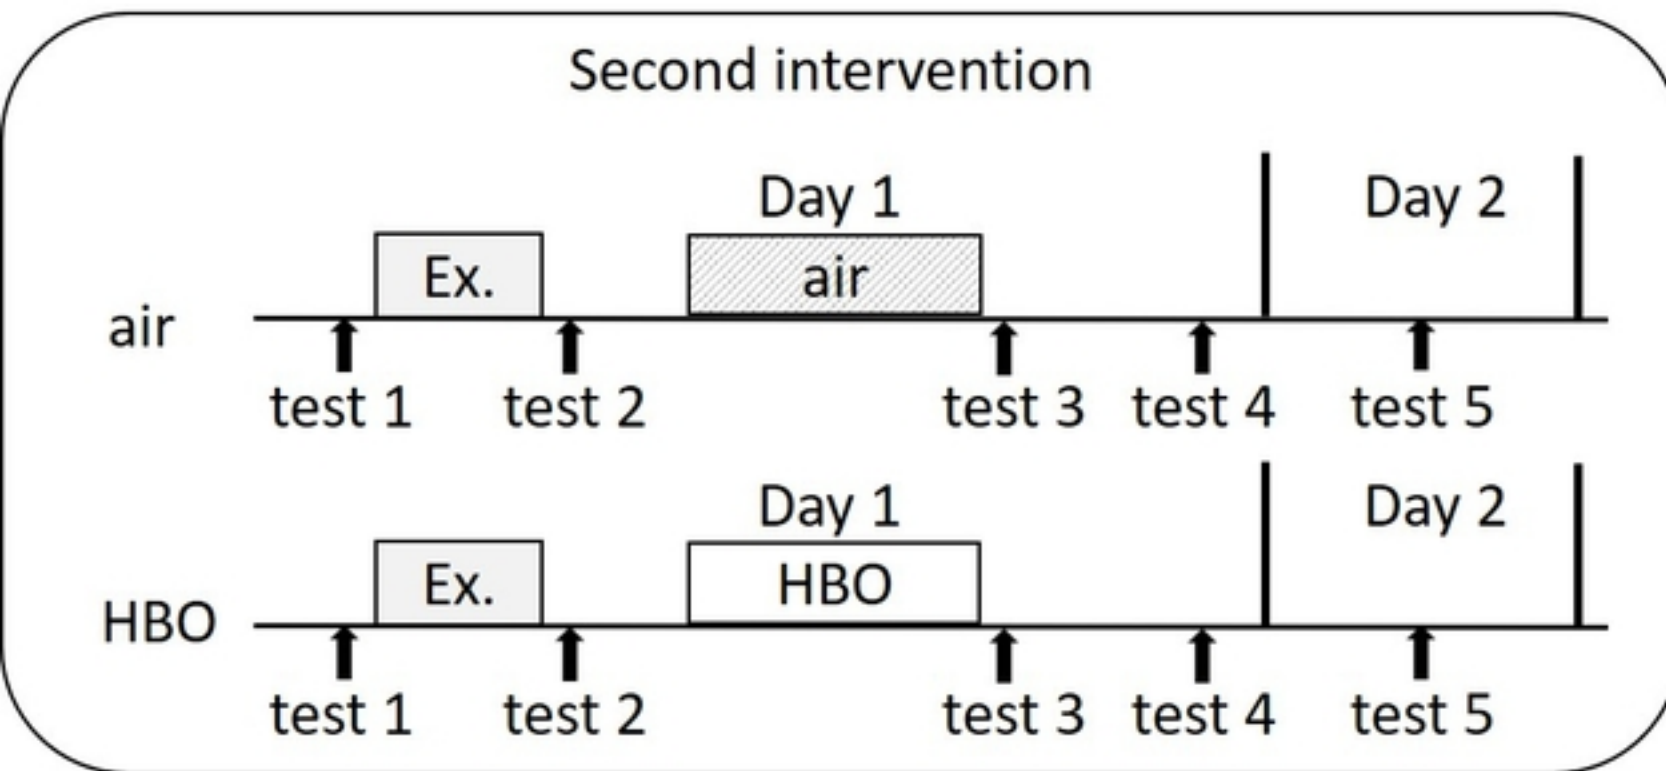

Figure 4



|              |     | Answer |     |    |
|--------------|-----|--------|-----|----|
|              |     | HBO    | air |    |
| Intervention | HBO | 3      | 5   | 8  |
|              | air | 2      | 5   | 7  |
|              |     | 5      | 10  | 15 |

|                        |
|------------------------|
| Accurate rate: 53.3%   |
| Inaccurate rate: 46.7% |

Figure 5

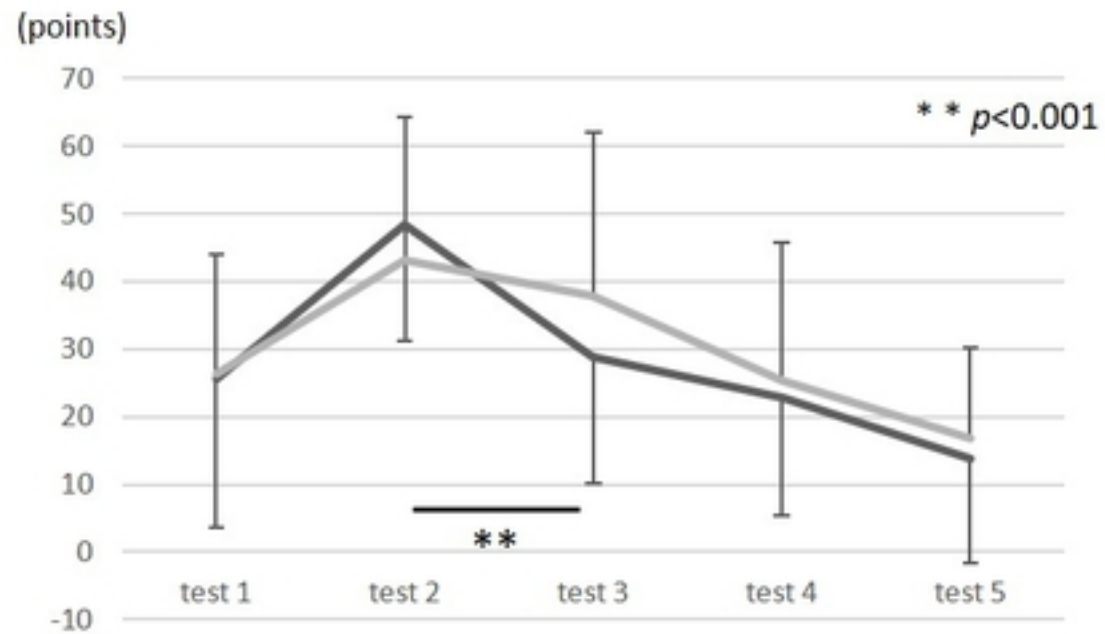

a: whole-body fatigue

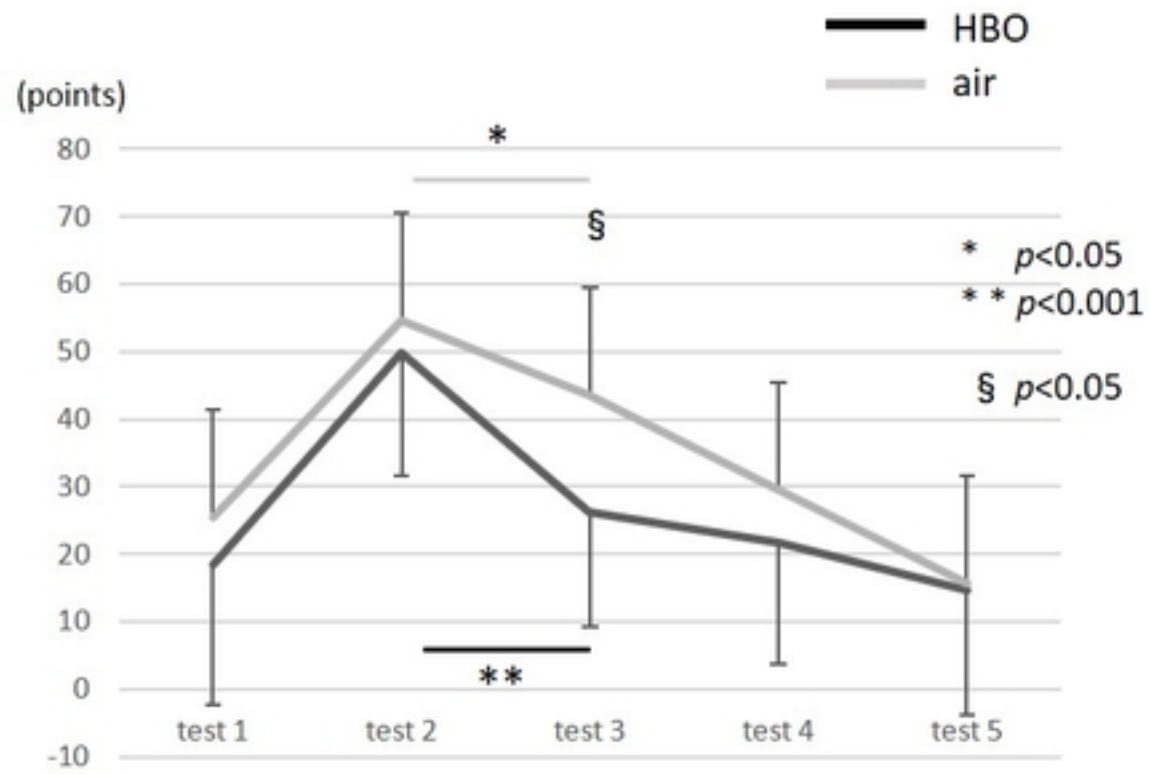

b: leg fatigue

Figure 6

— HBO  
— air

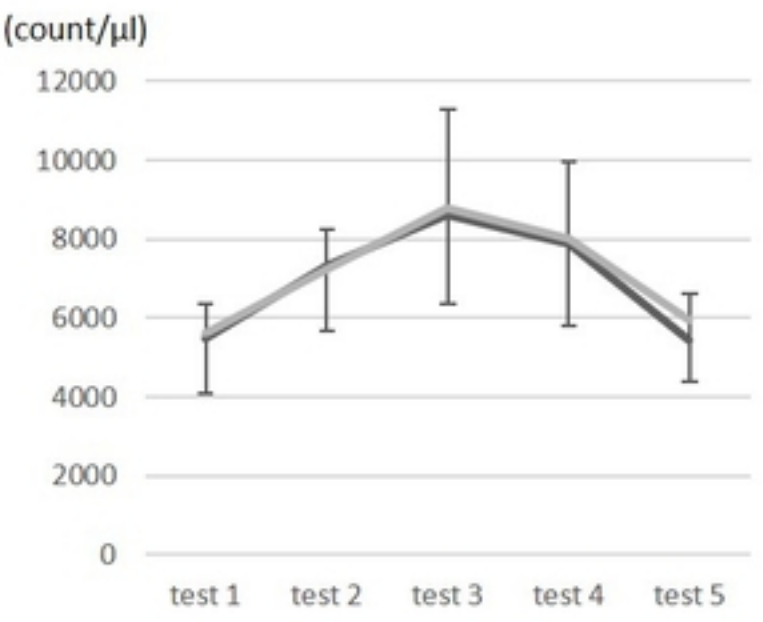

a: WBC

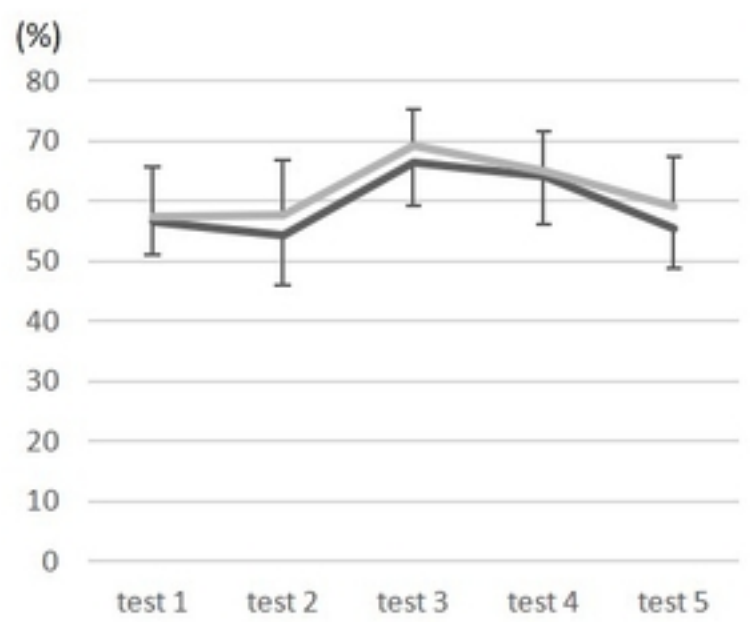

b: neutrophils

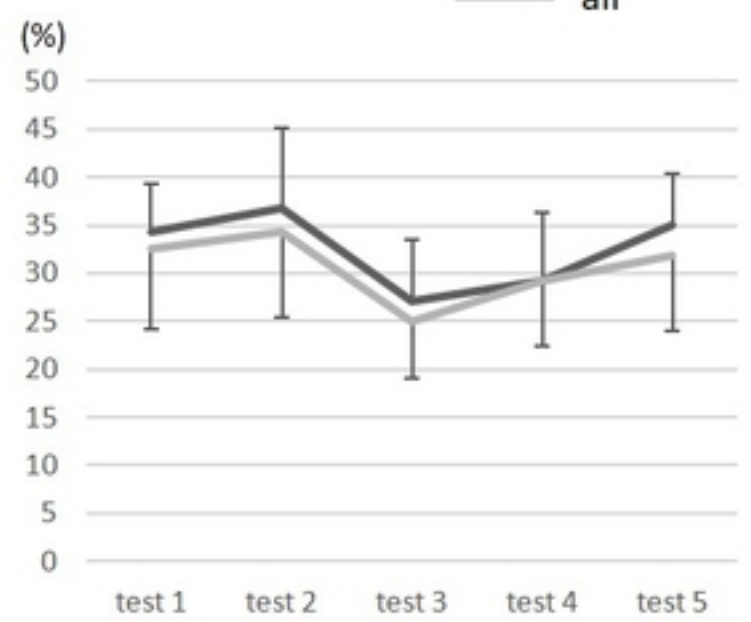

c: lymphocytes

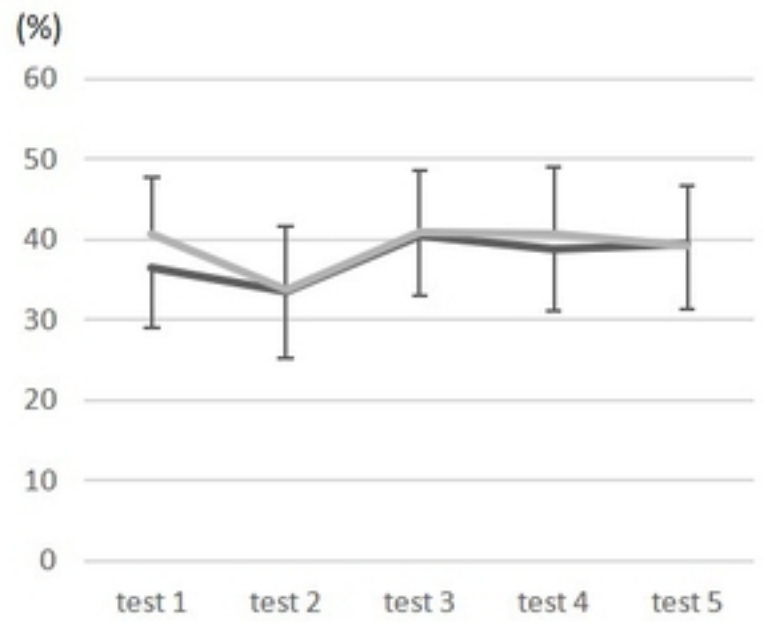

d: CD4-type lymphocytes

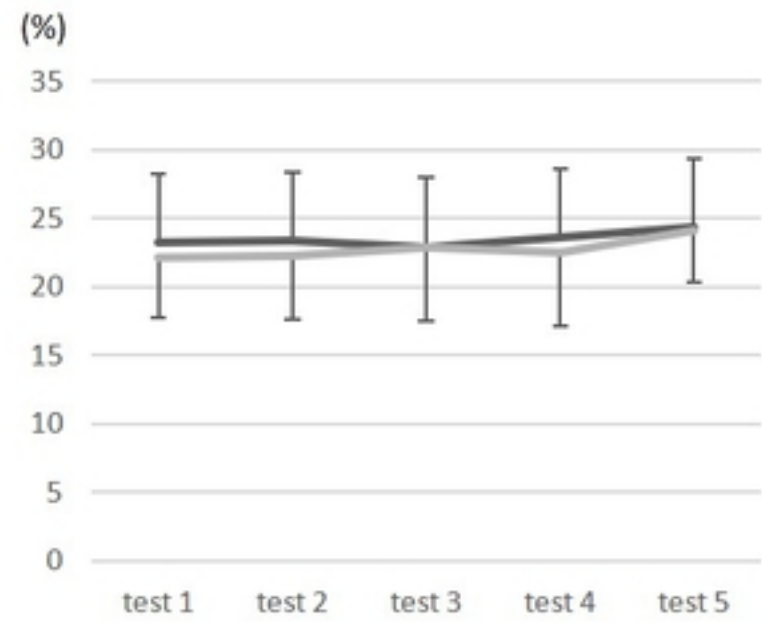

e: CD8-type lymphocytes

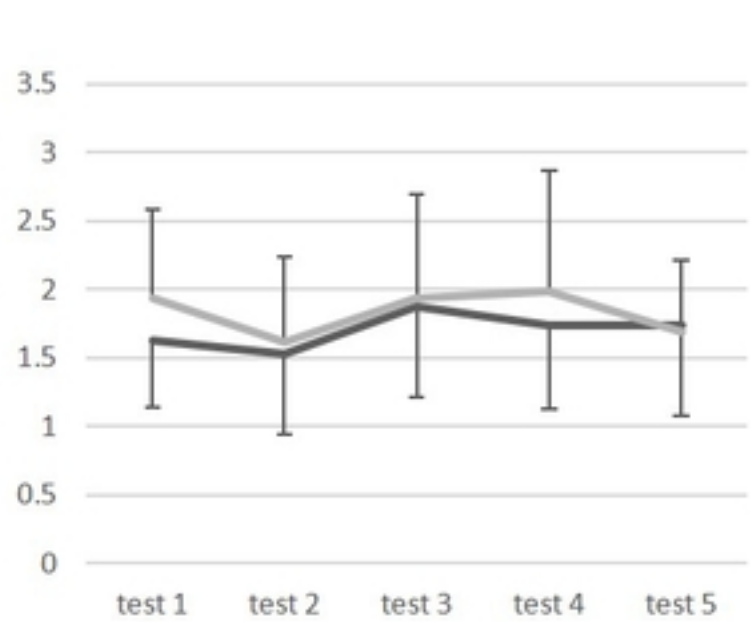

f: CD4/CD8 ratio

Figure 7-1

— HBO  
— air

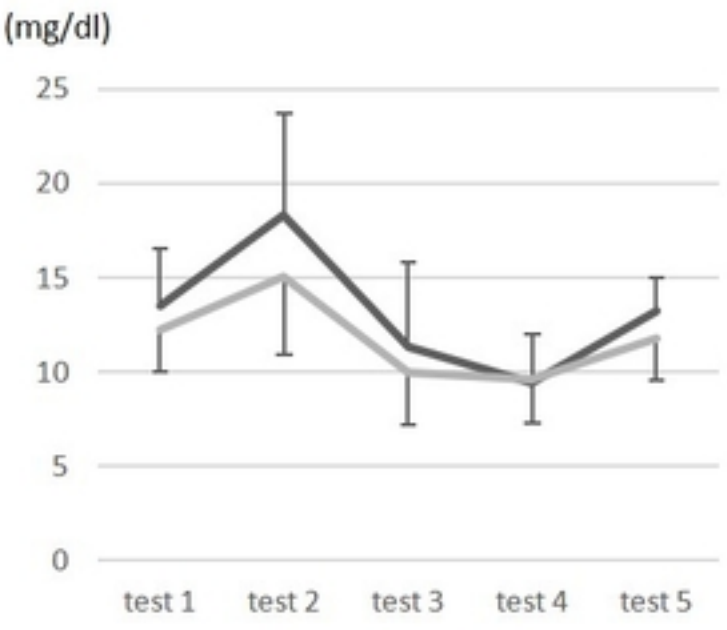

g: Lactic acid

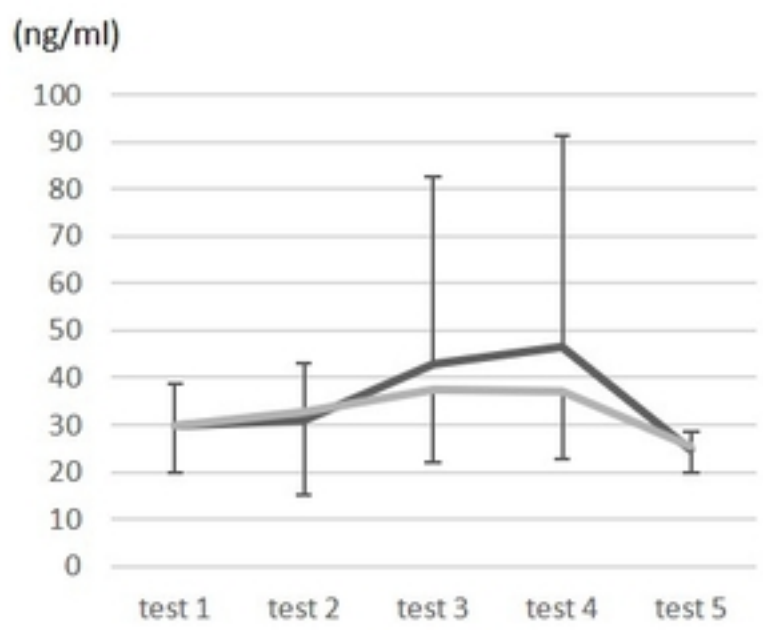

h: myoglobin

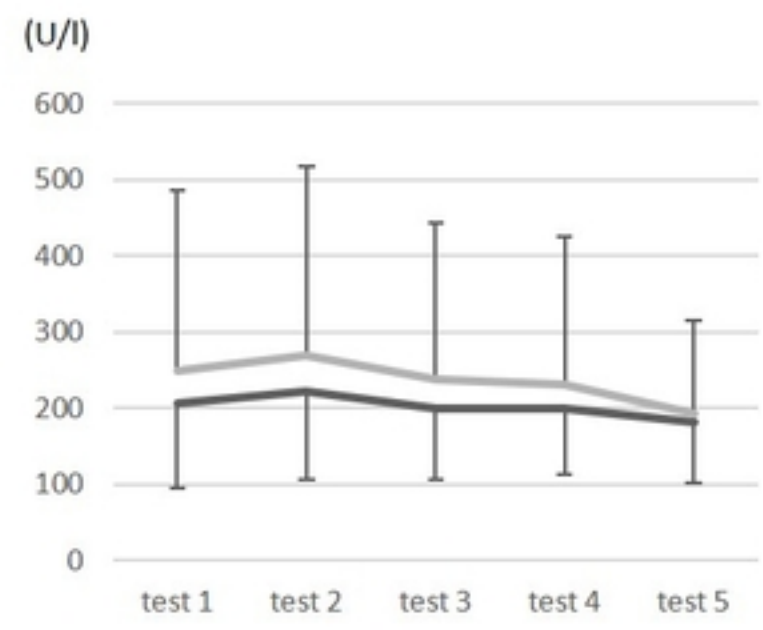

i: CK

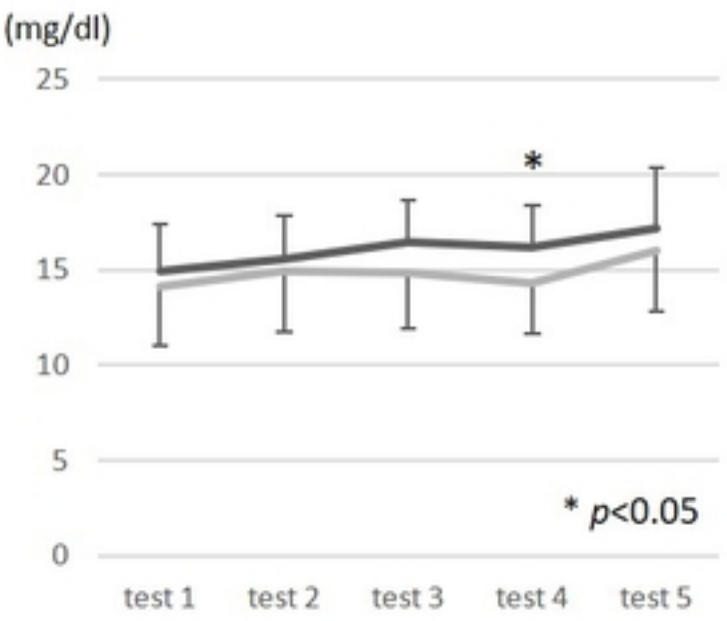

j: BUN

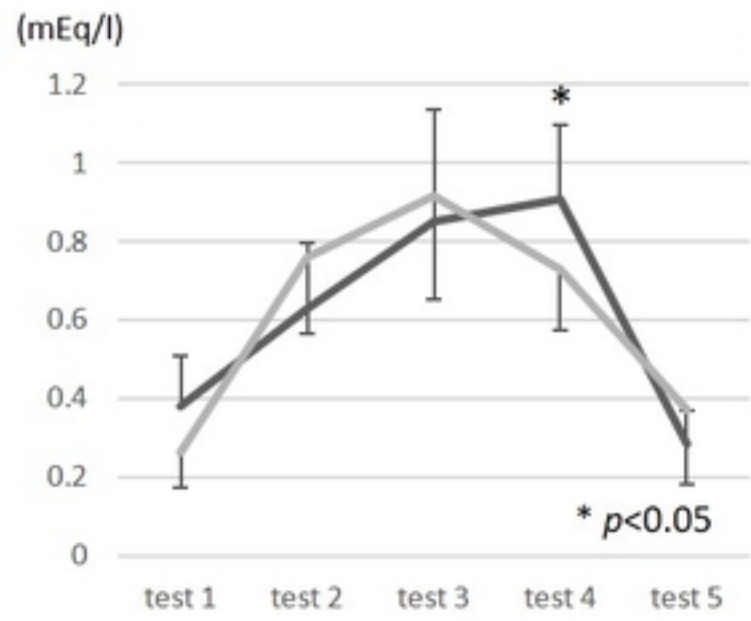

k: free fatty acids

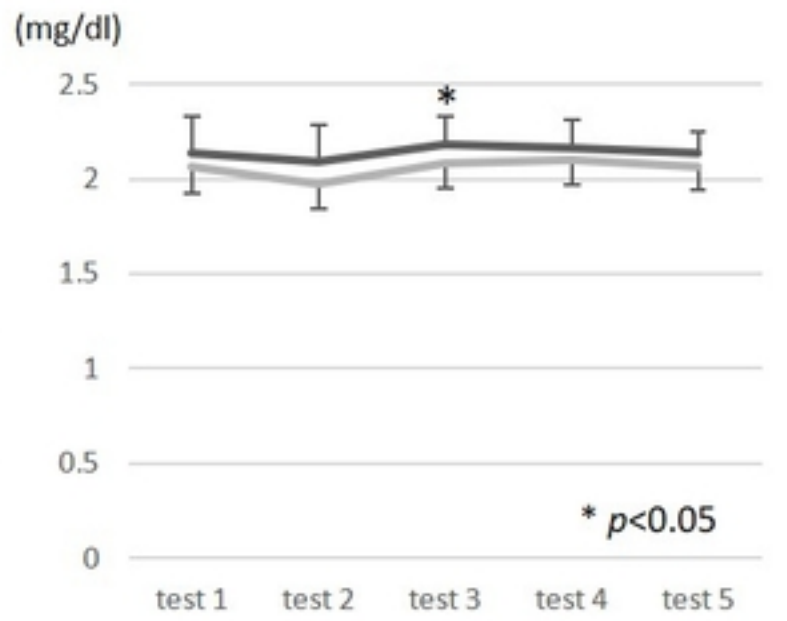

l: Mg

Figure 7-2

— HBO  
— air

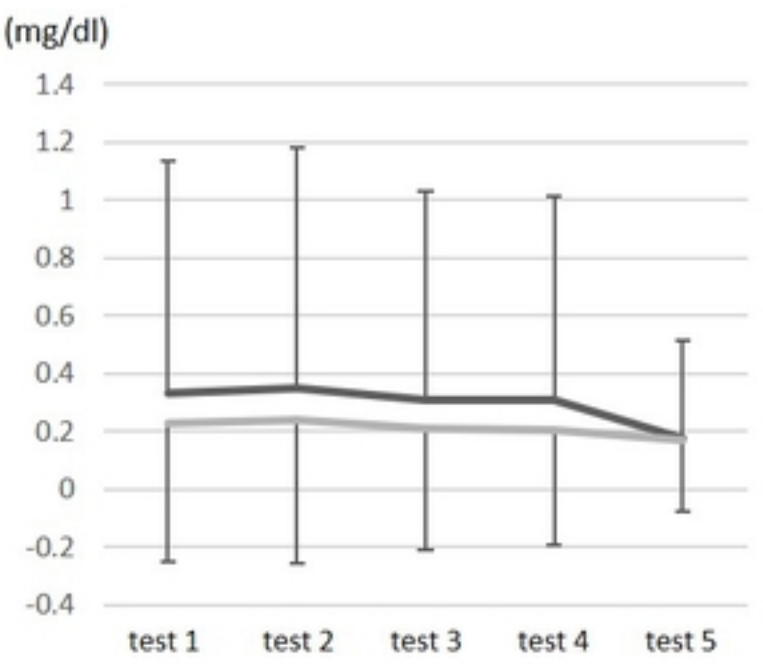

m: CRP

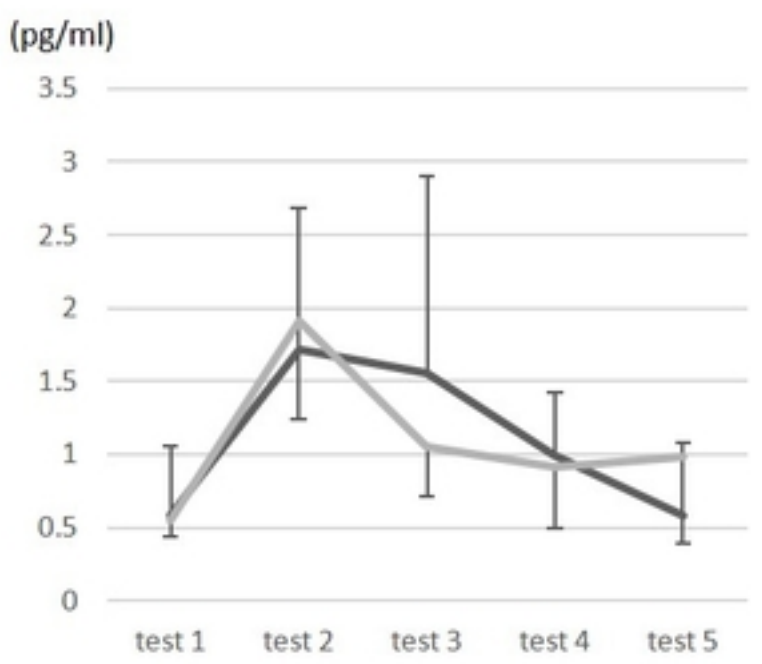

n: IL-6

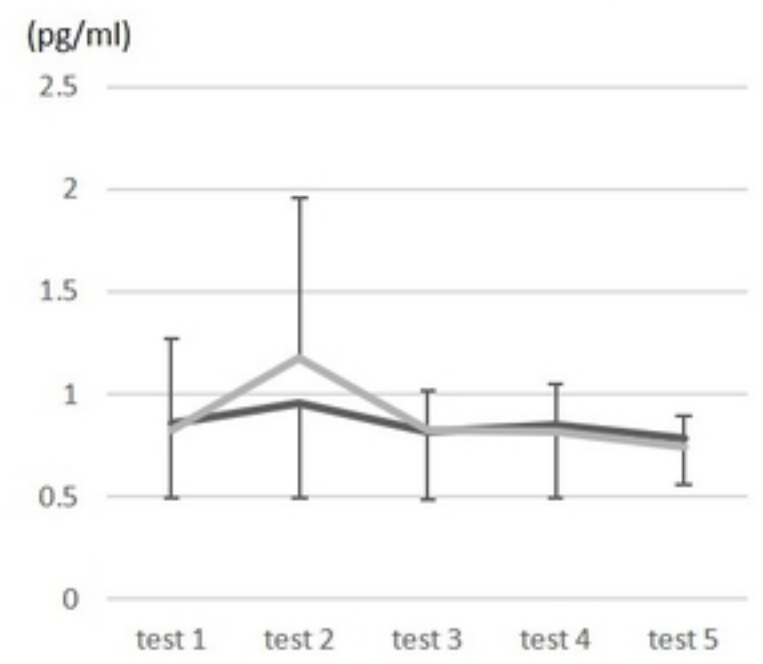

o: TNF- $\alpha$

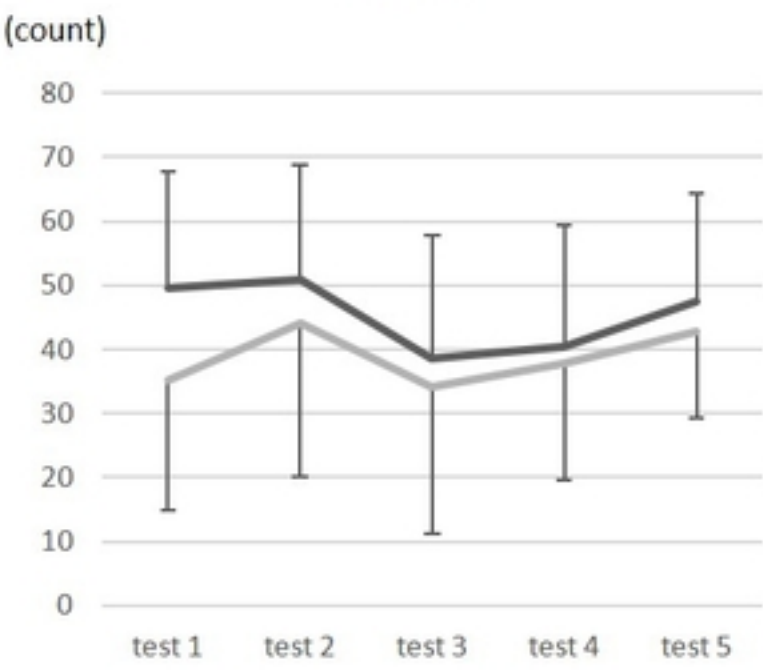

p: NK cell

Figure 7-3

Enrollment

Allocation

Analysis Follow up

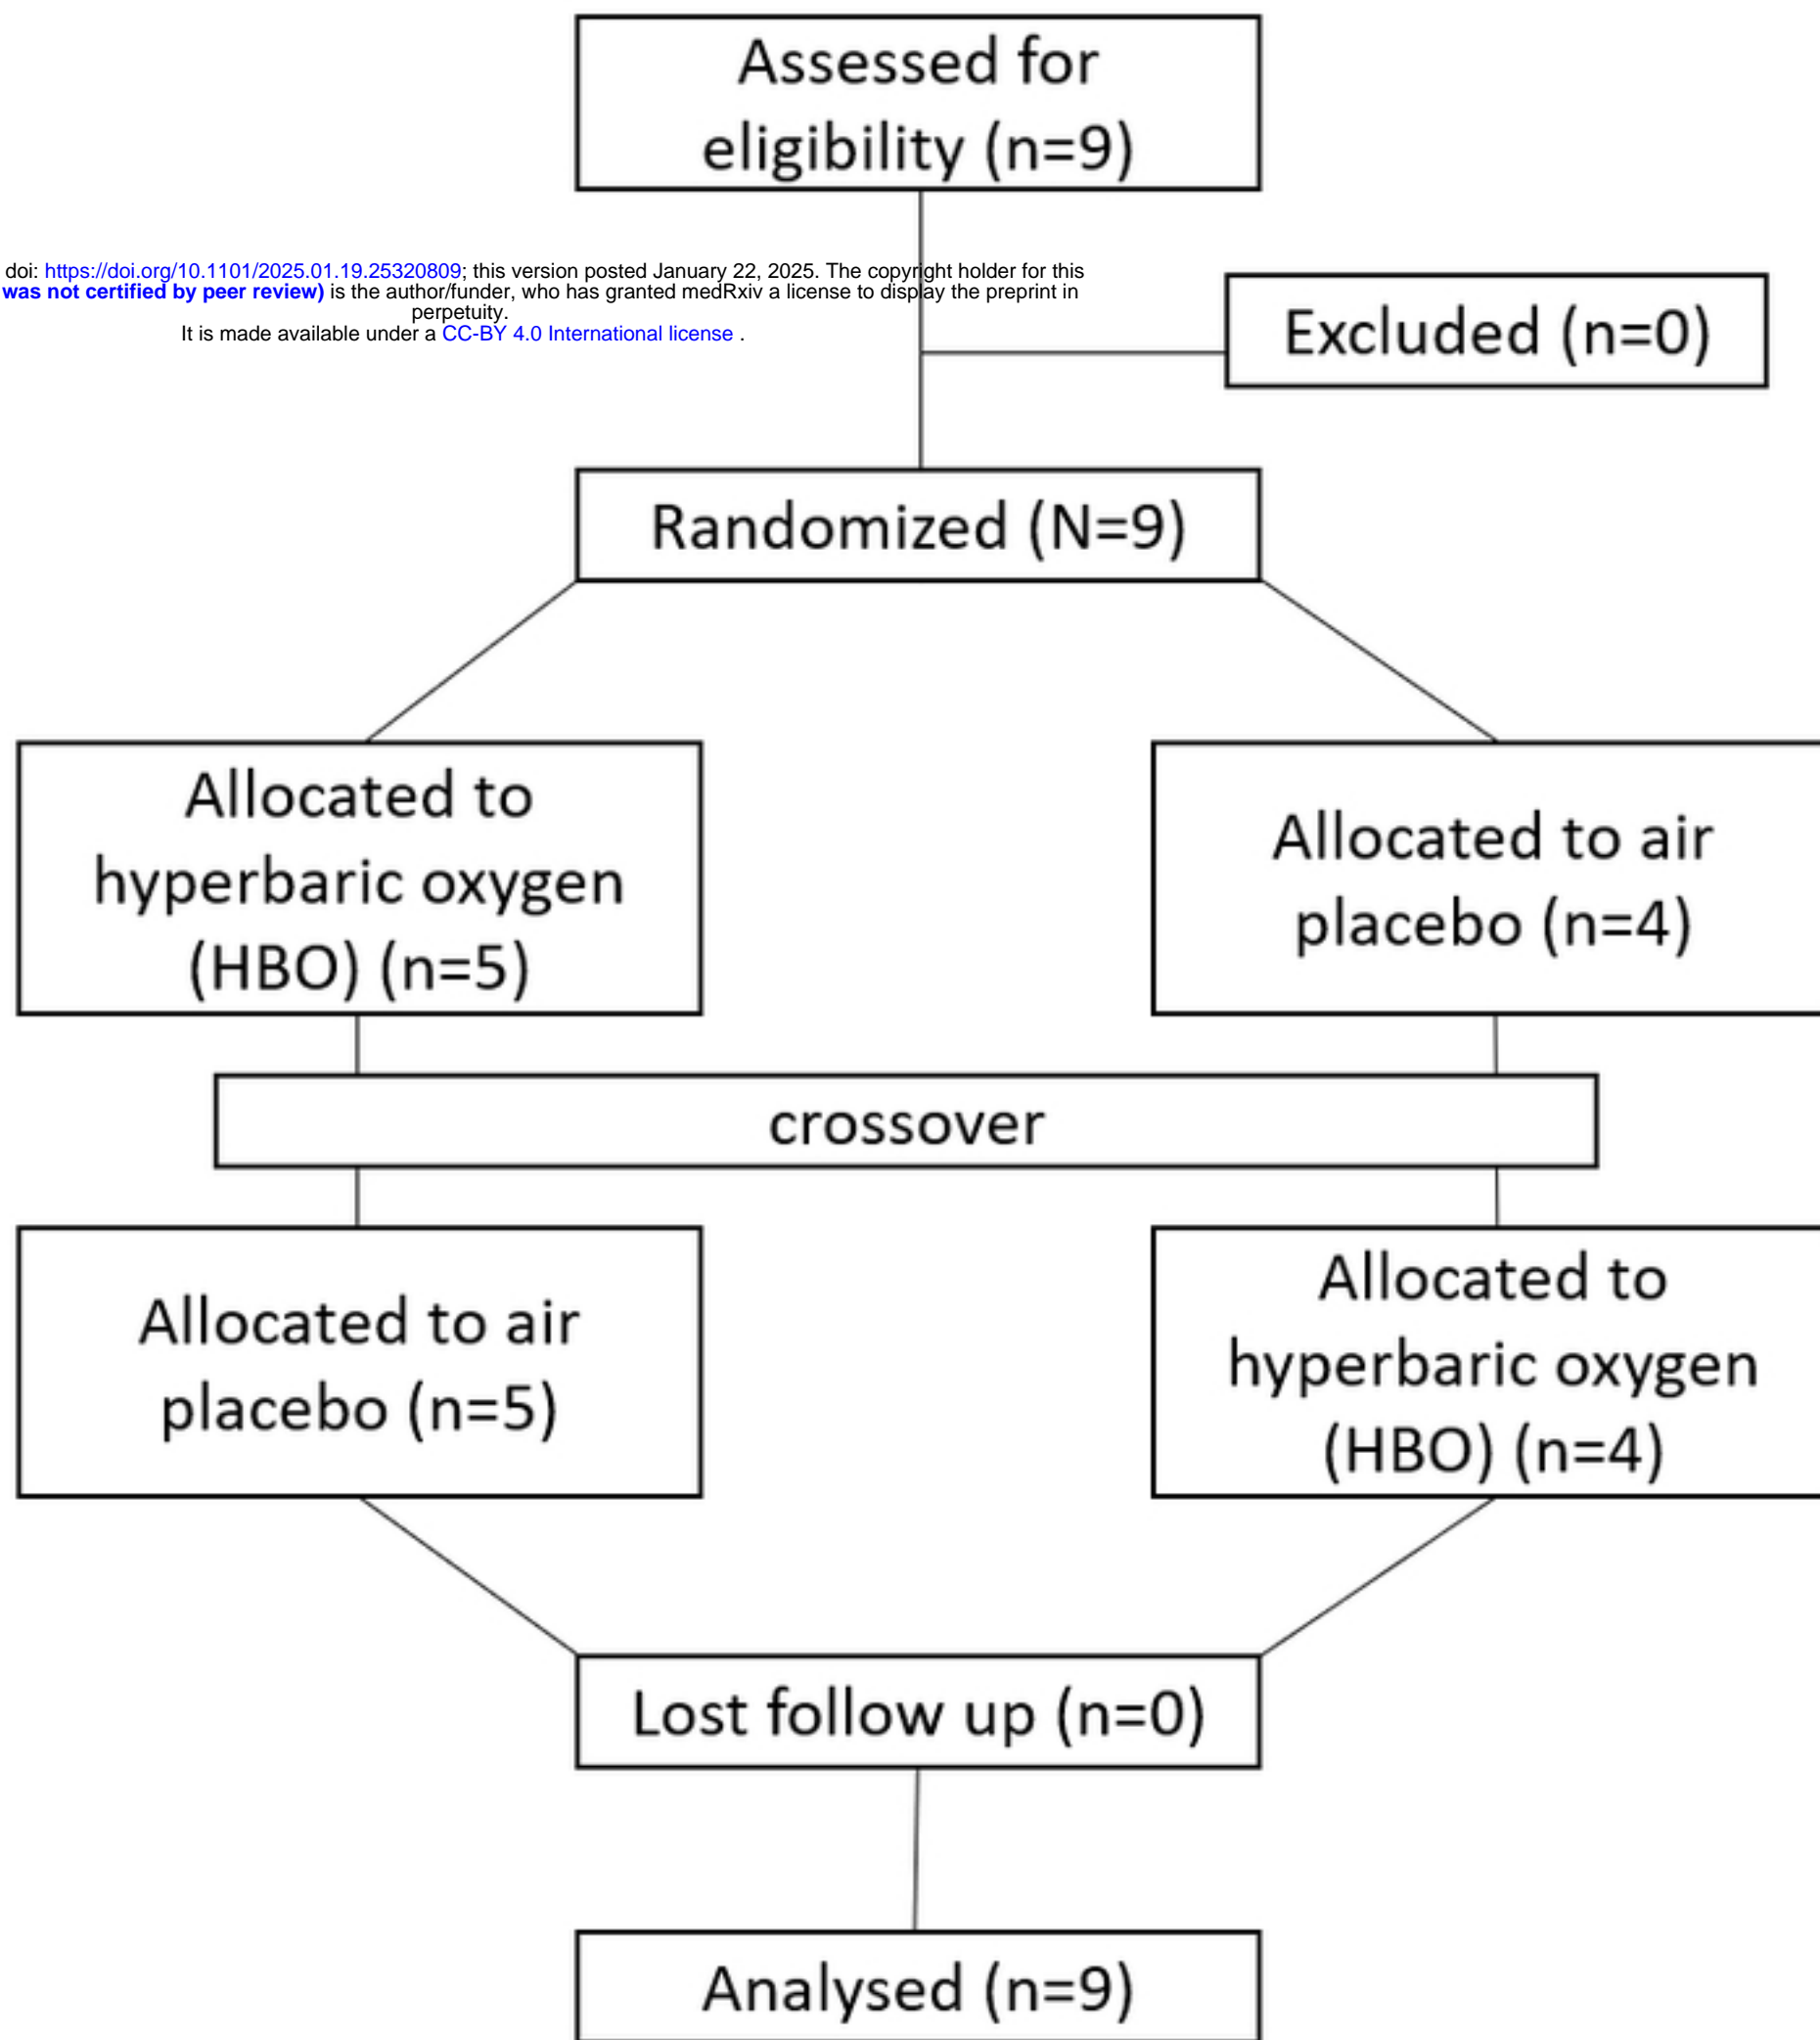

medRxiv preprint doi: <https://doi.org/10.1101/2025.01.19.25320809>; this version posted January 22, 2025. The copyright holder for this preprint (which was not certified by peer review) is the author/funder, who has granted medRxiv a license to display the preprint in perpetuity. It is made available under a [CC-BY 4.0 International license](https://creativecommons.org/licenses/by/4.0/).

Figure 1
